# Supplementary material for: Changes in wastewater treatment performance and activated sludge properties of a membrane bioreactor at low temperature operation
Source: Royal Society of Chemistry journal article supplement (doi:10.1039/c4em00174e), 2014-01-01
Supplement: c4em00174e1.pdf [file c4em00174e1.pdf]

Table S1 - Water quality and other important parameters of the MBR operated at room and low wastewater temperatures.

| <b>Constituent</b>    | <b>Room temperature operation<br/>(mean ± standard deviation)</b> | <b>Low temperature operation<br/>(mean ± standard deviation)</b> | <b><i>p</i>-value</b>               |
|-----------------------|-------------------------------------------------------------------|------------------------------------------------------------------|-------------------------------------|
| Effluent COD          | (10 ± 5) mg/L                                                     | (25 ± 4) mg/L                                                    | <b><i>2.73</i>×10<sup>-8</sup></b>  |
| Effluent nitrate      | (34.5 ± 0.3) mg N/L                                               | (32.8 ± 0.6) mg N/L                                              | <b><i>1.92</i>×10<sup>-4</sup></b>  |
| Effluent nitrite      | (0.12 ± 0.03) mg N/L                                              | (0.09 ± 0.04) mg N/L                                             | 0.19                                |
| Effluent ammonium     | (0.05 ± 0.05) mg N/L                                              | (0.04 ± 0.02) mg N/L                                             | 0.70                                |
| Biomass concentration | (9,967 ± 874) mg COD/L                                            | (8,182 ± 606) mg COD/L                                           | <b><i>5.38</i>×10<sup>-6</sup></b>  |
| Heterotrophic SOUR    | (1.50 ± 0.19) g O <sub>2</sub> /(g VSS·d)                         | (0.40 ± 0.03) g O <sub>2</sub> /(g VSS·d)                        | <b><i>1.51</i>×10<sup>-2</sup></b>  |
| Autotrophic SOUR      | (1.58 ± 0.07) g O <sub>2</sub> /(g VSS·d)                         | (0.24 ± 0.01) g O <sub>2</sub> /(g VSS·d)                        | <b><i>1.21</i>×10<sup>-3</sup></b>  |
| TMP                   | (27.1 ± 7.1) kPa                                                  | (27.8 ± 7.0) kPa                                                 | 0.58                                |
| EPS                   | (18.5 ± 1.3) mg/g VSS                                             | (15.3 ± 1.3) mg/g VSS                                            | <b><i>0.04</i></b>                  |
| Total protein         | (0.6 ± 0.1) mg/g VSS                                              | (0.4 ± 0.1) mg/g VSS                                             | <b><i>0.02</i></b>                  |
| Polysaccharide        | (17.9 ± 1.3) mg/g VSS                                             | (14.9 ± 1.3) mg/g VSS                                            | 0.05                                |
| SVI                   | (102 ± 13) mL/g VSS                                               | (146 ± 8) mL/g VSS                                               | <b><i>6.41</i>×10<sup>-10</sup></b> |

Table S2 - Activated sludge sampling scheme

| <b>Date</b> | <b>Days before (-)/after (+)<br/>temperature change<sup>1</sup></b> |
|-------------|---------------------------------------------------------------------|
| 11-14-2012  | - 14                                                                |
| 11-25-2012  | - 3                                                                 |
| 12-06-2012  | + 8                                                                 |
| 12-18-2012  | + 20                                                                |
| 01-16-2013  | + 50                                                                |
| 02-07-2013  | + 72                                                                |
| 03-01-2013  | + 94                                                                |

Note: Only two samples are discussed in Fig. 4: The sample collected on 11-25-2012 (3 d before the wastewater temperature change) and the sample collected on 02-07-2013 (72 d after the temperature change).

Table S3. Primers and PCR programs for target bacterial species.

| Target bacterial group <sup>1</sup> | Primer <sup>2</sup> | Sequence (5'-3')                             | PCR program                                                                                           |
|-------------------------------------|---------------------|----------------------------------------------|-------------------------------------------------------------------------------------------------------|
| β-Proteobacteria AOB                | Eub338F             | ACT, CCT, ACG,<br>GGA, GGC, AGC <sup>3</sup> | 5 min at 95 °C + 35 cycles of (1.5 min at 95 °C; 0.5 min at 65 °C; 1.5 min at 72°C) + 10 min at 72 °C |
|                                     | Nso1225R            | CGC, CAT, TGT,<br>ATT, ACG, TGT, GA          |                                                                                                       |
| <i>Nitrobacter</i> spp.             | Eub338F             | ACT, CCT, ACG,<br>GGA, GGC, AGC              | 5 min at 95 °C + 35 cycles of (1.5 min at 95 °C; 0.5 min at 65 °C; 1.5 min at 72°C) + 10 min at 72 °C |
|                                     | NIT3R               | CCT, GTG, CTC,<br>CAT, GCT, CCG              |                                                                                                       |
| <i>Nitrospira</i> spp.              | Eub338F             | ACT, CCT, ACG,<br>GGA, GGC, AGC              | 5 min at 95 °C + 35 cycles of (1.5 min at 95 °C; 0.5 min at 65 °C; 1.5 min at 72°C) + 10 min at 72 °C |
|                                     | Ntspa685R           | CGG, GAA, TTC,<br>CGC, GCT, C                |                                                                                                       |

Note: 1. AOB - Ammonia oxidizing bacteria. *Nitrobacter* spp. and *Nitrospira* spp. are subgroups of nitrite oxidizing bacteria (NOB). 2. F - Forward primer. R - Reverse primer. Primer EUB338F was labeled with fluorescent dye 6-carboxyfluorescein (6-FAM) at the 5' end. PCR was performed in a MJ Mini™ Personal Thermal Cycler (Bio-Rad Laboratories, Inc, Hercules, CA). More information is available elsewhere.<sup>1</sup>

## Reference

- 1 S. Siripong and B. E. Rittmann, *Water Research*, 2007, **41**, 1110-1120.
